# Supplementary material for: Bidirectional modulation of negative emotional states by parallel genetically-distinct basolateral amygdala pathways to ventral striatum subregions
Source: PubMed Central journal article supplement — bioRxiv. 2024 Jun 21:2024.06.19.599749. Preprint. [Version 1] doi: 10.1101/2024.06.19.599749 (PMC11213032; doi:10.1101/2024.06.19.599749), 2024-06-21

# Supplemental Figure 1

**A**

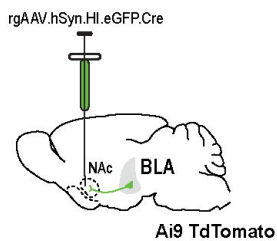

**B**

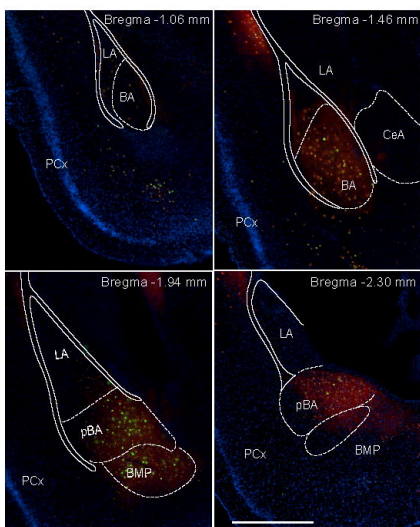

**C**

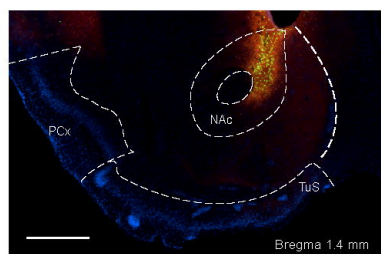

**D**

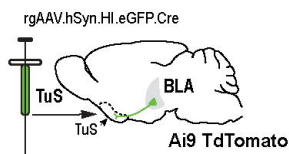

**E**

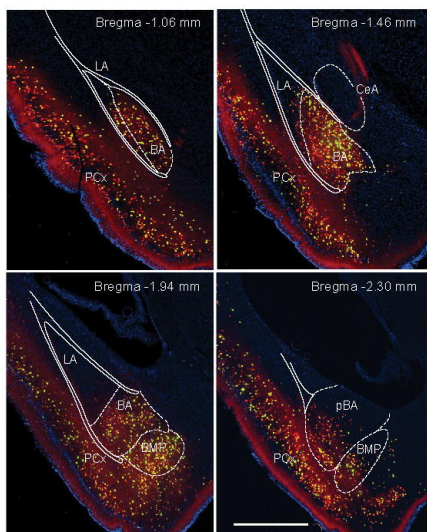

**F**

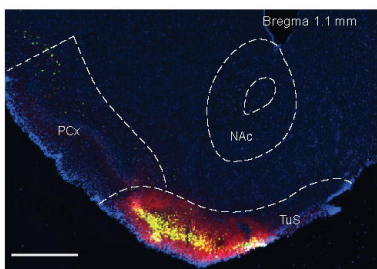

**G**

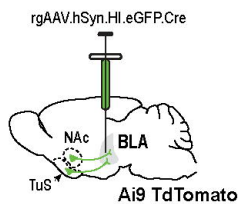

**H**

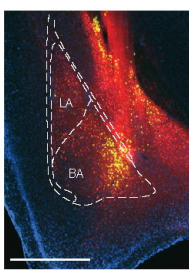

**I**

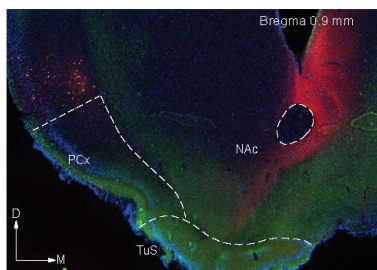

# Supplemental Figure 2

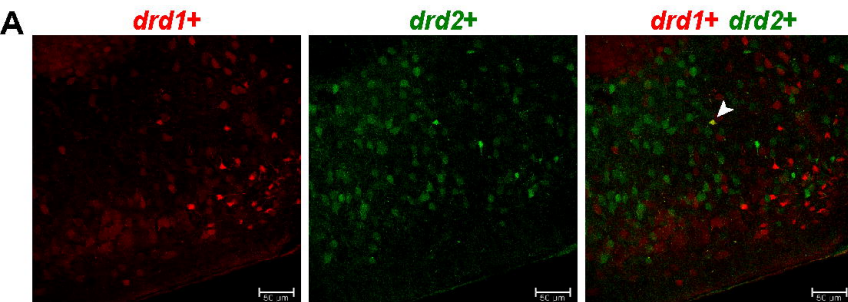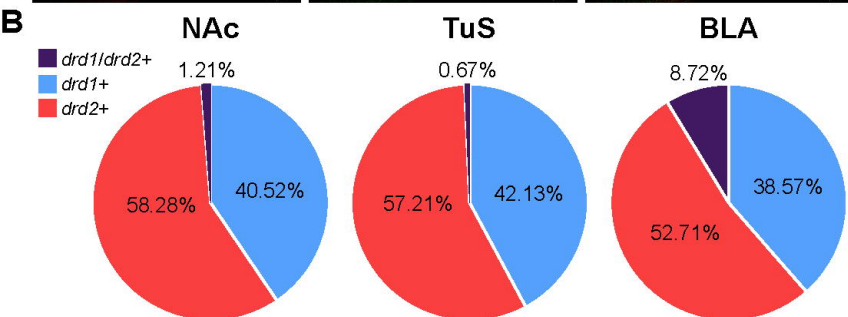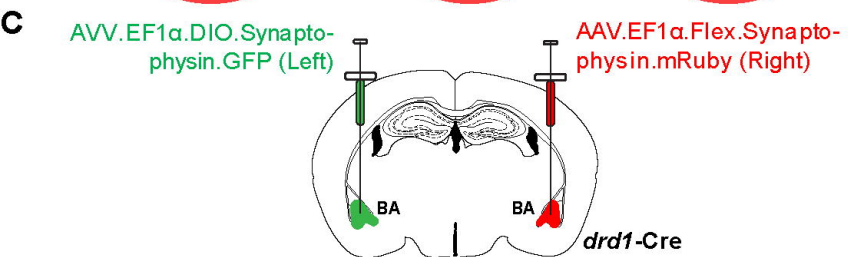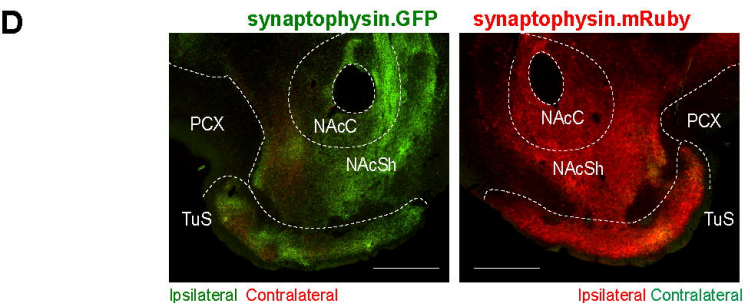

# Supplemental Figure 3

● *drd1*+ neurons

○ *drd1*∅ (putative *drd2*+ ) neurons

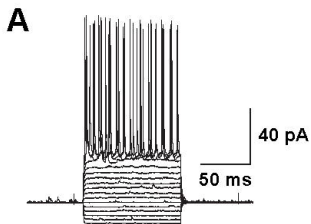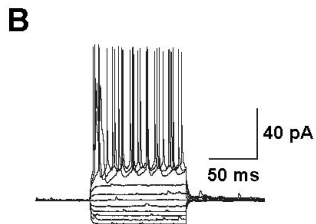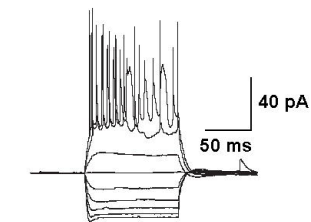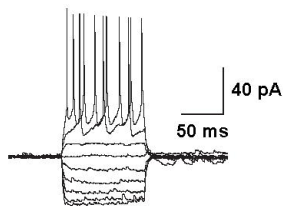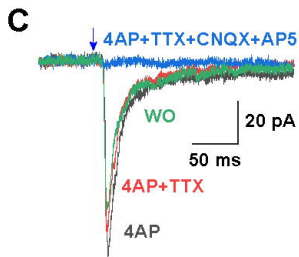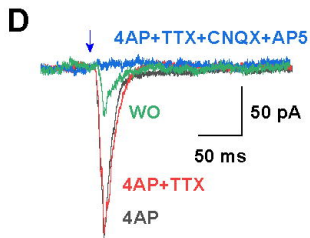

Supplemental Figure 4

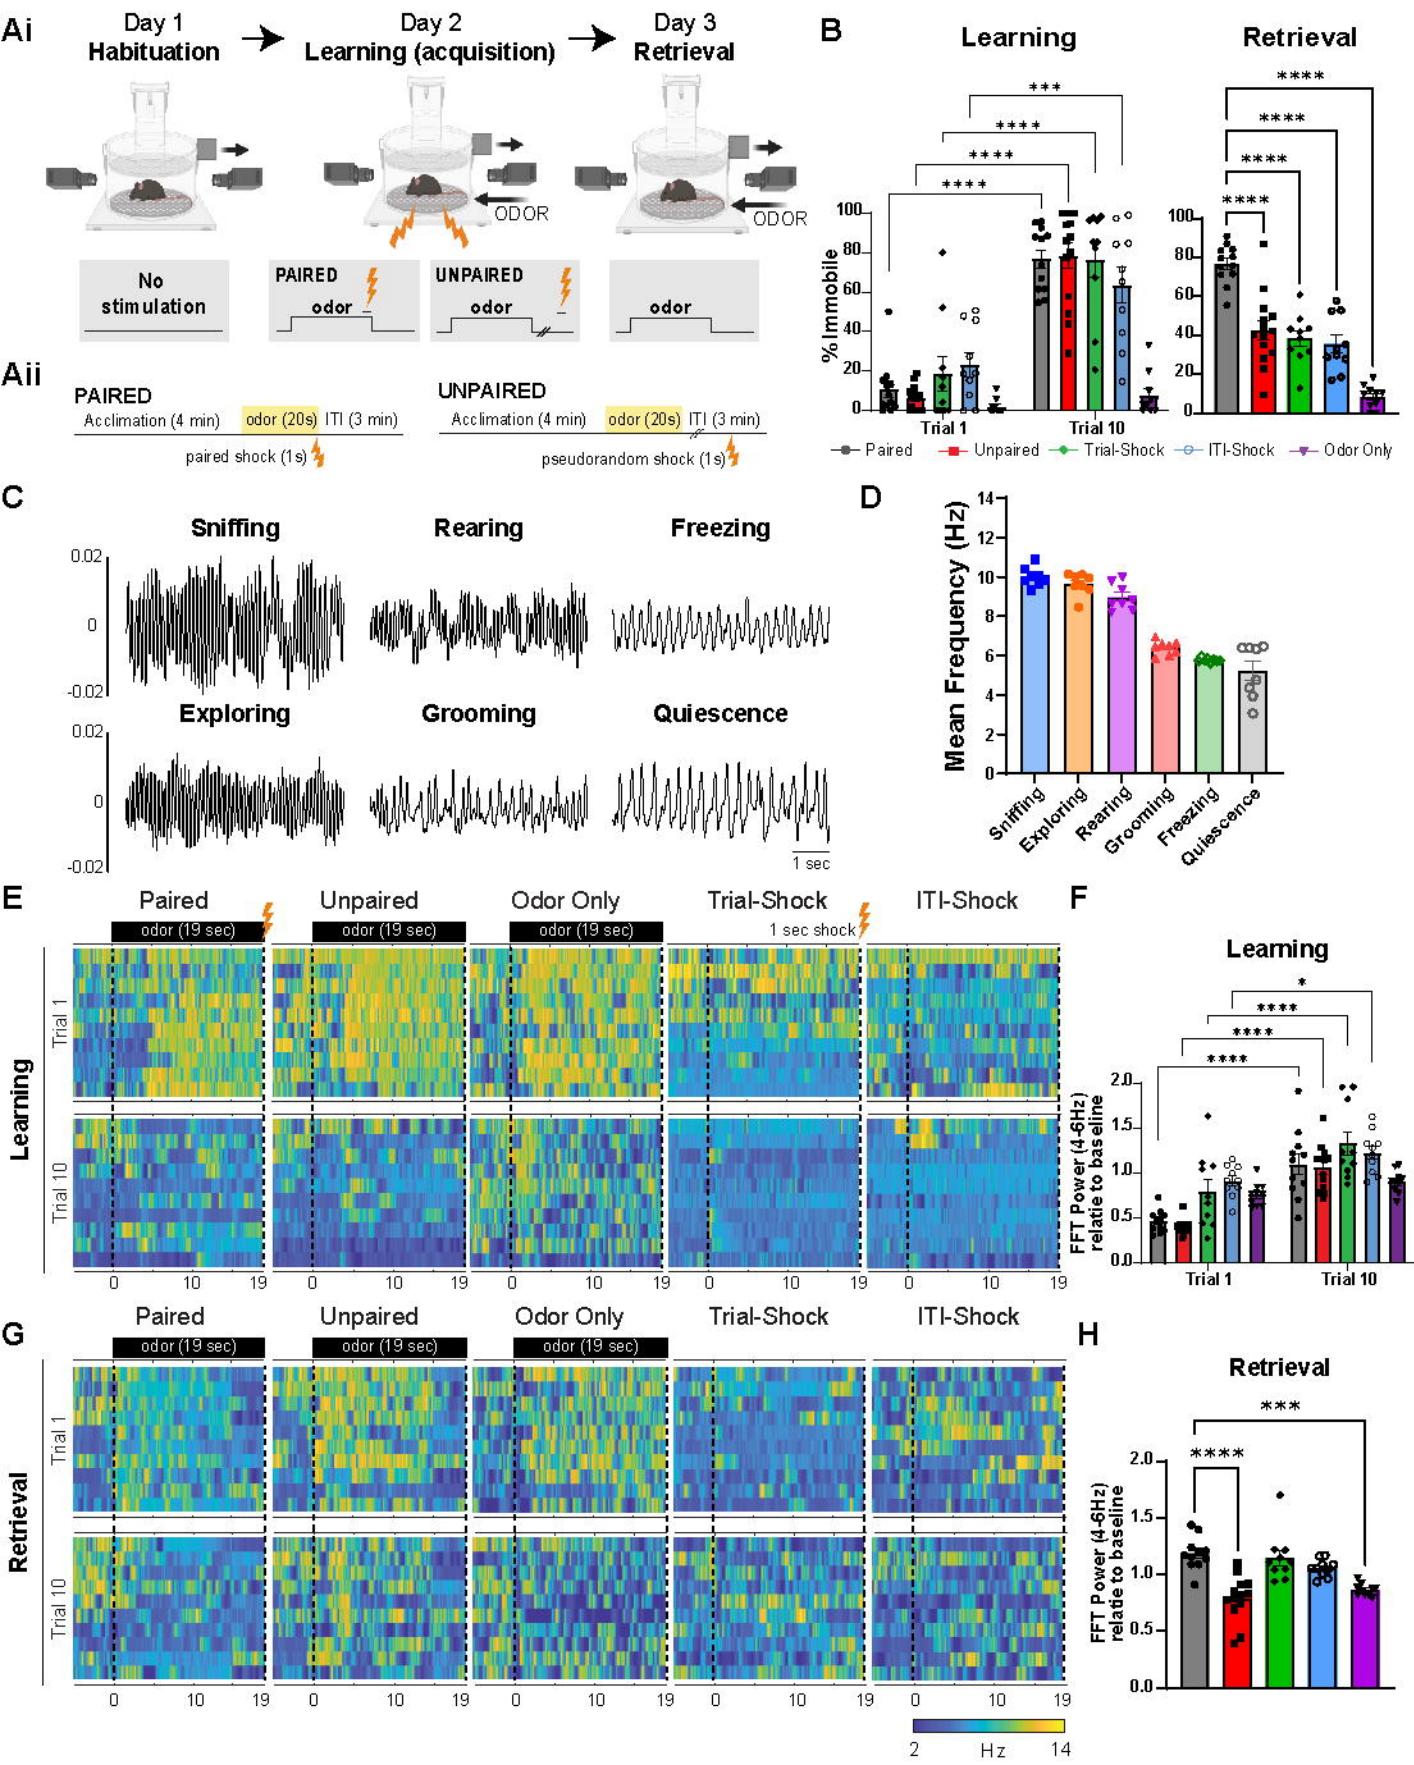



# Supplemental Figure 5

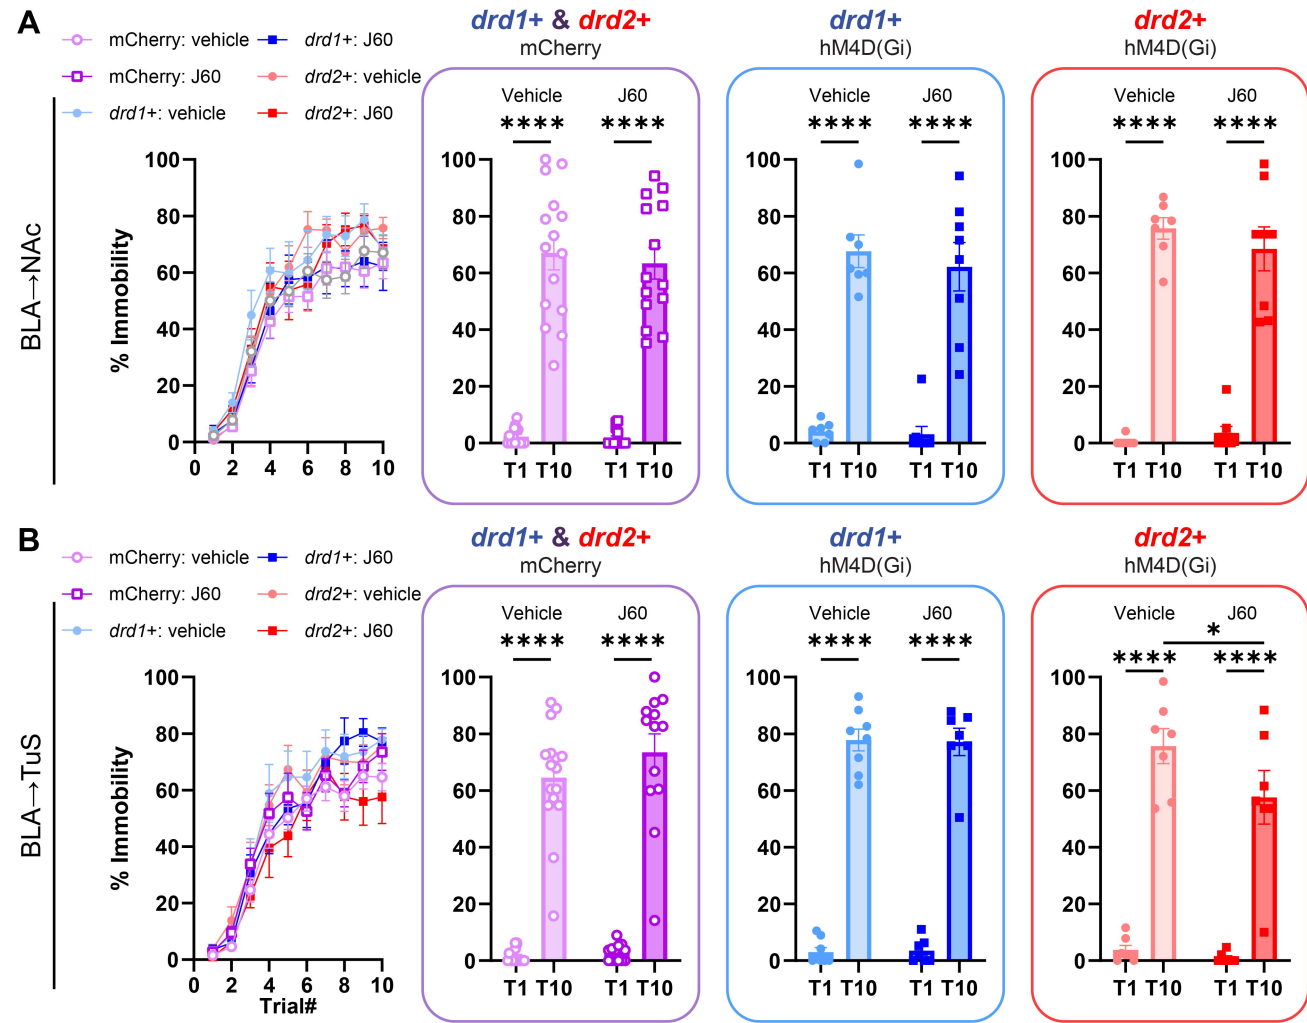

Supplement: NIHPP2024.06.19.599749v1-supplement-2.pdf [file NIHPP2024.06.19.599749v1-supplement-2.pdf]
